# Supplementary material
Source: ML conference proceedings conference paper supplement (https://proceedings.neurips.cc/paper_files/paper/2019/hash/e94550c93cd70fe748e6982b3439ad3b-Abstract.html)
Supplement: Supplementary file [file e94550c93cd70fe748e6982b3439ad3b-Supplemental.zip]

## Appendix: Envy-Free Classification

### A Natarajan Dimension Primer

We briefly present the Natarajan dimension. For more details, we refer the reader to [27].

We say that a family  $\mathcal{G}$  *multi-class shatters* a set of points  $x_1, \dots, x_n$  if there exist labels  $y_1, \dots, y_n$  and  $y'_1, \dots, y'_n$  such that for every  $i \in [n]$  we have  $y_i \neq y'_i$ , and for any subset  $C \subset [n]$  there exists  $g \in \mathcal{G}$  such that  $g(x_i) = y_i$  if  $i \in C$  and  $g(x_i) = y'_i$  otherwise. The Natarajan dimension of a family  $\mathcal{G}$  is the cardinality of the largest set of points that can be multi-class shattered by  $\mathcal{G}$ .

For example, suppose we have a feature map  $\Psi : \mathcal{X} \times \mathcal{Y} \rightarrow \mathbb{R}^q$  that maps each individual-outcome pair to a  $q$ -dimensional feature vector, and consider the family of functions that can be written as  $g(x) = \arg \max_{y \in \mathcal{Y}} w^\top \Psi(x, y)$  for weight vectors  $w \in \mathbb{R}^q$ . This family has Natarajan dimension at most  $q$ .

For a set  $S \subset \mathcal{X}$  of points, we let  $\mathcal{G}|_S$  denote the restriction of  $\mathcal{G}$  to  $S$ , which is any subset of  $\mathcal{G}$  of minimal size such that for every  $g \in \mathcal{G}$  there exists  $g' \in \mathcal{G}|_S$  such that  $g(x) = g'(x)$  for all  $x \in S$ . The size of  $\mathcal{G}|_S$  is the number of different labelings of the sample  $S$  achievable by functions in  $\mathcal{G}$ . The following Lemma is the analogue of Sauer's lemma for binary classification.

**Lemma 1** (Natarajan). *For a family  $\mathcal{G}$  of Natarajan dimension  $d$  and any subset  $S \subset \mathcal{X}$ , we have  $|\mathcal{G}|_S| \leq |S|^d |\mathcal{Y}|^{2d}$ .*

Classes of low Natarajan dimension also enjoy the following uniform convergence guarantee.

**Lemma 2.** *Let  $\mathcal{G}$  have Natarajan dimension  $d$  and fix a loss function  $\ell : \mathcal{G} \times \mathcal{X} \rightarrow [0, 1]$ . For any distribution  $P$  over  $\mathcal{X}$ , if  $S$  is an i.i.d. sample drawn from  $P$  of size  $O(\frac{1}{\epsilon^2}(d \log |\mathcal{Y}| + \log \frac{1}{\delta}))$ , then with probability at least  $1 - \delta$  we have  $\sup_{g \in \mathcal{G}} |\mathbb{E}_{x \sim P}[\ell(g, x)] - \frac{1}{n} \sum_{x \in S} \ell(g, x)| \leq \epsilon$ .*

### B Appendix for Section 3

**Theorem 1.** *Let  $d$  be a metric on  $\mathcal{X}$ ,  $P$  be a distribution on  $\mathcal{X}$ , and  $u$  be an  $L$ -Lipschitz utility function. Let  $S$  be a set of individuals such that there exists  $\hat{\mathcal{X}} \subset \mathcal{X}$  with  $P(\hat{\mathcal{X}}) \geq 1 - \alpha$  and  $\sup_{x \in \hat{\mathcal{X}}} d(x, \text{NN}_S(x)) \leq \beta/(2L)$ . Then for any classifier  $h : S \rightarrow \Delta(\mathcal{Y})$  that is EF on  $S$ , the extension  $\bar{h} : \mathcal{X} \rightarrow \Delta(\mathcal{Y})$  given by  $\bar{h}(x) = h(\text{NN}_S(x))$  is  $(\alpha, \beta)$ -EF on  $P$ .*

*Proof.* Let  $h : S \rightarrow \Delta(\mathcal{Y})$  be any EF classifier on  $S$  and  $\bar{h} : \mathcal{X} \rightarrow \Delta(\mathcal{Y})$  be the nearest neighbor extension. Sample  $x$  and  $x'$  from  $P$ . Then,  $x$  belongs to the subset  $\hat{\mathcal{X}}$  with probability at least  $1 - \alpha$ . When this occurs,  $x$  has a neighbor within distance  $\beta/(2L)$  in the sample. Using the Lipschitz continuity of  $u$ , we have  $|u(x, \bar{h}(x)) - u(\text{NN}_S(x), h(\text{NN}_S(x)))| \leq \beta/2$ . Similarly,  $|u(x, \bar{h}(x')) - u(\text{NN}_S(x), h(\text{NN}_S(x')))| \leq \beta/2$ . Finally, since  $\text{NN}_S(x)$  does not envy  $\text{NN}_S(x')$  under  $h$ , it follows that  $x$  does not envy  $x'$  by more than  $\beta$  under  $\bar{h}$ .  $\square$

**Lemma 3.** *Suppose  $\mathcal{X} \subset \mathbb{R}^q$ ,  $d(x, x') = \|x - x'\|_2$ , and let  $D = \sup_{x, x' \in \mathcal{X}} d(x, x')$  be the diameter of  $\mathcal{X}$ . For any distribution  $P$  over  $\mathcal{X}$ ,  $\beta > 0$ ,  $\alpha > 0$ , and  $\delta > 0$  there exists  $\hat{\mathcal{X}} \subset \mathcal{X}$  such that  $P(\hat{\mathcal{X}}) \geq 1 - \alpha$  and, if  $S$  is an i.i.d. sample drawn from  $P$  of size  $|S| = O(\frac{1}{\alpha}(\frac{LD\sqrt{q}}{\beta})^q(d \log \frac{LD\sqrt{q}}{\beta} + \log \frac{1}{\delta}))$ , then with probability at least  $1 - \delta$ ,  $\sup_{x \in \hat{\mathcal{X}}} d(x, \text{NN}_S(x)) \leq \beta/(2L)$ .*

*Proof.* Let  $C$  be the smallest cube containing  $\mathcal{X}$ . Since the diameter of  $\mathcal{X}$  is  $D$ , the side-length of  $C$  is at most  $D$ . Let  $s = \beta/(2L\sqrt{q})$  be the side-length such that a cube with side-length  $s$  has diameter  $\beta/(2L)$ . It takes at most  $m = \lceil D/s \rceil^q$  cubes of side-length  $s$  to cover  $C$ . Let  $C_1, \dots, C_m$  be such a covering, where each  $C_i$  has side-length  $s$ .

Let  $C_i$  be any cube in the cover for which  $P(C_i) > \alpha/m$ . The probability that a sample of size  $n$  drawn from  $P$  does not contain a sample in  $C_i$  is at most  $(1 - \alpha/m)^n \leq e^{-n\alpha/m}$ . Let

$I = \{i \in [m] : P(C_i) \geq \alpha/m\}$ . By the union bound, the probability that there exists  $i \in I$  such that  $C_i$  does not contain a sample is at most  $me^{-n\alpha/m}$ . Setting

$$\begin{aligned} n &= \frac{m}{\alpha} \ln \frac{m}{\delta} \\ &= O\left(\frac{1}{\alpha} \left(\frac{LD\sqrt{q}}{\beta}\right)^q \left(q \log \frac{LD\sqrt{q}}{\beta} + \log \frac{1}{\delta}\right)\right) \end{aligned}$$

results in this upper bound being  $\delta$ . For the remainder of the proof, assume this high probability event occurs.

Now let  $\hat{\mathcal{X}} = \bigcup_{i \in I} C_i$ . For each  $j \notin I$ , we know that  $P(C_j) < \alpha/m$ . Since there are at most  $m$  such cubes, their total probability mass is at most  $\alpha$ . It follows that  $P(\hat{\mathcal{X}}) \geq 1 - \alpha$ . Moreover, every point  $x \in \hat{\mathcal{X}}$  belongs to one of the cubes  $C_i$  with  $i \in I$ , which also contains a sample point. Since the diameter of the cubes in our cover is  $\beta/(2L)$ , it follows that  $\text{dist}(x, \text{NN}_S(x)) \leq \beta/(2L)$  for every  $x \in \hat{\mathcal{X}}$ , as required.  $\square$

**Theorem 2.** *There exists a space of individuals  $\mathcal{X} \subset \mathbb{R}^q$ , and a distribution  $P$  over  $\mathcal{X}$  such that, for every randomized algorithm  $\mathcal{A}$  that extends classifiers on a sample to  $\mathcal{X}$ , there exists an  $L$ -Lipschitz utility function  $u$  such that, when a sample of individuals  $S$  of size  $n = 4^q/2$  is drawn from  $P$  without replacement, there exists an EF classifier on  $S$  for which, with probability at least  $1 - 2\exp(-4^q/100) - \exp(-4^q/200)$  jointly over the randomness of  $\mathcal{A}$  and  $S$ , its extension by  $\mathcal{A}$  is not  $(\alpha, \beta)$ -EF with respect to  $P$  for any  $\alpha < 1/25$  and  $\beta < L/8$ .*

*Proof.* Let the space of individuals be  $\mathcal{X} = [0, 1]^q$  and the outcomes be  $\mathcal{Y} = \{0, 1\}$ . We partition the space  $\mathcal{X}$  into cubes of side length  $s = 1/4$ . So, the total number of cubes is  $m = (1/s)^q = 4^q$ . Let these cubes be denoted by  $c_1, c_2, \dots, c_m$ , and let their centers be denoted by  $\mu_1, \mu_2, \dots, \mu_m$ . Next, let  $P$  be the uniform distribution over the centers  $\mu_1, \mu_2, \dots, \mu_m$ . For brevity, whenever we say “utility function” in the rest of the proof, we mean “ $L$ -Lipschitz utility function.”

To prove the theorem, we use Yao’s minimax principle [33]. Specifically, consider the following two-player zero sum game. Player 1 chooses a deterministic algorithm  $\mathcal{D}$  that extends classifiers on a sample to  $\mathcal{X}$ , and player 2 chooses a utility function  $u$  on  $\mathcal{X}$ . For any subset  $S \subset \mathcal{X}$ , define the classifier  $h_{u,S} : S \rightarrow \mathcal{Y}$  by assigning each individual in  $S$  to his favorite outcome with respect to the utility function  $u$ , i.e.  $h_{u,S}(x) = \arg \max_{y \in \mathcal{Y}} u(x, y)$  for each  $x \in S$ , breaking ties lexicographically. Define the cost of playing algorithm  $\mathcal{D}$  against utility function  $u$  as the probability over the sample  $S$  (of size  $m/2$  drawn from  $P$  without replacement) that the extension of  $h_{u,S}$  by  $\mathcal{D}$  is not  $(\alpha, \beta)$ -EF with respect to  $P$  for any  $\alpha < 1/25$  and  $\beta < L/8$ . Yao’s minimax principle implies that for any randomized algorithm  $\mathcal{A}$ , its expected cost with respect to the worst-case utility function  $u$  is at least as high as the expected cost of any distribution over utility functions that is played against the best deterministic algorithm  $\mathcal{D}$  (which is tailored for that distribution). Therefore, we establish the desired lower bound by choosing a specific distribution over utility functions, and showing that the best deterministic algorithm against it has an expected cost of at least  $1 - 2\exp(-m/100) - \exp(-m/200)$ .

To define this distribution over utility functions, we first sample outcomes  $y_1, y_2, \dots, y_m$  i.i.d. from Bernoulli(1/2). Then, we associate each cube center  $\mu_i$  with the outcome  $y_i$ , and refer to this outcome as the *favorite* of  $\mu_i$ . For brevity, let  $\neg y$  denote the outcome other than  $y$ , i.e.  $\neg y = (1 - y)$ . For any  $x \in \mathcal{X}$ , we define the utility function as follows. Letting  $c_j$  be the cube that  $x$  belongs to,

$$u(x, y_j) = L \left[ \frac{s}{2} - \|x - \mu_j\|_\infty \right]; \quad u(x, \neg y_j) = 0. \quad (6)$$

See Figure 5 for an illustration.

We claim that the utility function of Equation (6) is indeed  $L$ -Lipschitz with respect to any  $L_p$  norm. This is because for any cube  $c_i$ , and for any  $x, x' \in c_i$ , we have

$$\begin{aligned} |u(x, y_i) - u(x', y_i)| &= L \left| \|x - \mu_i\|_\infty - \|x' - \mu_i\|_\infty \right| \\ &\leq L \|x - x'\|_\infty \leq L \|x - x'\|_p. \end{aligned}$$

Moreover, for the other outcome, we have  $u(x, \neg y_i) = u(x', \neg y_i) = 0$ . It follows that  $u$  is  $L$ -Lipschitz within every cube. At the boundary of the cubes, the utility for any outcome is 0, and hence

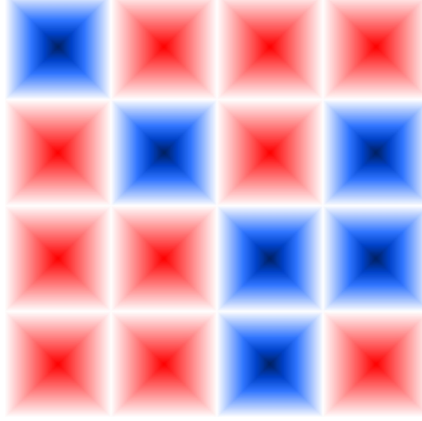

Figure 5: Illustration of  $\mathcal{X}$  and an example utility function  $u$  for  $d = 2$ . Red shows preference for 1, blue shows preference for 0, and darker shades correspond to more intense preference. (The gradients are rectangular to match the  $L_\infty$  norm, so, strangely enough, the misleading X pattern is an optical illusion.)

$u$  is also continuous throughout  $\mathcal{X}$ . Because it is piecewise Lipschitz and continuous,  $u$  must be  $L$ -Lipschitz throughout  $\mathcal{X}$ , with respect to any  $L_p$  norm.

Next, let  $\mathcal{D}$  be an arbitrary deterministic algorithm that extends classifiers on a sample to  $\mathcal{X}$ . We draw the sample  $S$  of size  $m/2$  from  $P$  without replacement. Consider the distribution over favorites of individuals in  $S$ . Each individual in  $S$  has a favorite that is sampled independently from  $\text{Bernoulli}(1/2)$ . Hence, by Hoeffding's inequality, the fraction of individuals in  $S$  with a favorite of 0 is between  $\frac{1}{2} - \epsilon$  and  $\frac{1}{2} + \epsilon$  with probability at least  $1 - 2\exp(-m\epsilon^2)$ . The same holds simultaneously for the fraction of individuals with favorite 1.

Given the sample  $S$  and the utility function  $u$  on the sample (defined by the instantiation of their favorites), consider the classifier  $h_{u,S}$ , which maps each individual  $\mu_i$  in the sample  $S$  to his favorite  $y_i$ . This classifier is clearly EF on the sample. Consider the extension  $h_{u,S}^{\mathcal{D}}$  of  $h_{u,S}$  to the whole of  $\mathcal{X}$  as defined by algorithm  $\mathcal{D}$ . Define two sets  $Z_0$  and  $Z_1$  by letting  $Z_y = \{\mu_j \notin S \mid h_{u,S}^{\mathcal{D}}(\mu_j) = y\}$ , and let  $y_*$  denote an outcome that is assigned to at least half of the out-of-sample centers, i.e., an outcome for which  $|Z_{y_*}| \geq |Z_{\neg y_*}|$ . Furthermore, let  $\theta$  denote the fraction of out-of-sample centers assigned to  $y_*$ . Note that, since  $|S| = m/2$ , the number of out-of-sample centers is also exactly  $m/2$ . This gives us  $|Z_{y_*}| = \theta \frac{m}{2}$ , where  $\theta \geq \frac{1}{2}$ .

Consider the distribution of favorites in  $Z_{y_*}$  (these are independent from the ones in the sample since  $Z_{y_*}$  is disjoint from  $S$ ). Each individual in this set has a favorite sampled independently from  $\text{Bernoulli}(1/2)$ . Hence, by Hoeffding's inequality, the fraction of individuals in  $Z_{y_*}$  whose favorite is  $\neg y_*$  is at least  $\frac{1}{2} - \epsilon$  with probability at least  $1 - \exp(-\frac{m}{2}\epsilon^2)$ . We conclude that with a probability at least  $1 - 2\exp(-m\epsilon^2) - \exp(-\frac{m}{2}\epsilon^2)$ , the sample  $S$  and favorites (which define the utility function  $u$ ) are such that: (i) the fraction of individuals in  $S$  whose favorite is  $y \in \{0, 1\}$  is between  $\frac{1}{2} - \epsilon$  and  $\frac{1}{2} + \epsilon$ , and (ii) the fraction of individuals in  $Z_{y_*}$  whose favorite is  $\neg y_*$  is at least  $\frac{1}{2} - \epsilon$ .

We now show that for such a sample  $S$  and utility function  $u$ ,  $h_{u,S}^{\mathcal{D}}$  cannot be  $(\alpha, \beta)$ -EF with respect to  $P$  for any  $\alpha < 1/25$  and  $\beta < L/8$ . To this end, sample  $x$  and  $x'$  from  $P$ . One scenario where  $x$  envies  $x'$  occurs when (i) the favorite of  $x$  is  $\neg y_*$ , (ii)  $x$  is assigned to  $y_*$ , and (iii)  $x'$  is assigned to  $\neg y_*$ . Conditions (i) and (ii) are satisfied when  $x$  is in  $Z_{y_*}$  and his favorite is  $\neg y_*$ . We know that at least a  $\frac{1}{2} - \epsilon$  fraction of the individuals in  $Z_{y_*}$  have the favorite  $\neg y_*$ . Hence, the probability that conditions (i) and (ii) are satisfied by  $x$  is at least  $(\frac{1}{2} - \epsilon)|Z_{y_*}| \frac{1}{m} = (\frac{1}{2} - \epsilon)\frac{\theta}{2}$ . Condition (iii) is satisfied when  $x'$  is in  $S$  and has favorite  $\neg y_*$  (and hence assigned  $\neg y_*$ ), or, if  $x'$  is in  $Z_{\neg y_*}$ . We know that at least a  $(\frac{1}{2} - \epsilon)$  fraction of the individuals in  $S$  have the favorite  $\neg y_*$ . Moreover, the size of  $Z_{\neg y_*}$  is  $(1 - \theta)\frac{m}{2}$ . So, the probability that condition (iii) is satisfied by  $x'$  is at least

$$\frac{(\frac{1}{2} - \epsilon)|S| + |Z_{\neg y_*}|}{m} = \frac{1}{2} \left( \frac{1}{2} - \epsilon \right) + \frac{1}{2}(1 - \theta).$$

Since  $x$  and  $x'$  are sampled independently, the probability that all three conditions are satisfied is at least

$$\left(\frac{1}{2} - \epsilon\right) \frac{\theta}{2} \cdot \left[\frac{1}{2} \left(\frac{1}{2} - \epsilon\right) + \frac{1}{2}(1 - \theta)\right].$$

This expression is a quadratic function in  $\theta$ , that attains its minimum at  $\theta = 1$  irrespective of the value of  $\epsilon$ . Hence, irrespective of  $\mathcal{D}$ , this probability is at least  $\left[\frac{1}{2} \left(\frac{1}{2} - \epsilon\right)\right]^2$ . For concreteness, let us choose  $\epsilon$  to be  $1/10$  (although it can be set to be much smaller). On doing so, we have that the three conditions are satisfied with probability at least  $1/25$ . And when these conditions are satisfied, we have  $u(x, h_{u,S}^{\mathcal{D}}(x)) = 0$  and  $u(x, h_{u,S}^{\mathcal{D}}(x')) = Ls/2$ , i.e.,  $x$  envies  $x'$  by  $Ls/2 = L/8$ . This shows that, when  $x$  and  $x'$  are sampled from  $P$ , with probability at least  $1/25$ ,  $x$  envies  $x'$  by  $L/8$ . We conclude that with probability at least  $1 - 2\exp(-m/100) - \exp(-m/200)$  jointly over the selection of the utility function  $u$  and the sample  $S$ , the extension of  $h_{u,S}$  by  $\mathcal{D}$  is not  $(\alpha, \beta)$ -EF with respect to  $P$  for any  $\alpha < 1/25$  and  $\beta < L/8$ .

To convert the joint probability into expected cost in the game, note that for two discrete, independent random variables  $X$  and  $Y$ , and for a Boolean function  $\mathcal{E}(X, Y)$ , it holds that

$$\Pr_{X,Y}(\mathcal{E}(X, Y) = 1) = \mathbb{E}_X [\Pr_Y(\mathcal{E}(X, Y) = 1)]. \quad (7)$$

Given sample  $S$  and utility function  $u$ , let  $\mathcal{E}(u, S)$  be the Boolean function that equals 1 if and only if the extension of  $h_{u,S}$  by  $\mathcal{D}$  is not  $(\alpha, \beta)$ -EF with respect to  $P$  for any  $\alpha < 1/25$  and  $\beta < L/8$ . From Equation (7),  $\Pr_{u,S}(\mathcal{E}(u, S) = 1)$  is equal to  $\mathbb{E}_u [\Pr_S(\mathcal{E}(u, S) = 1)]$ . The latter term is exactly the expected value of the cost, where the expectation is taken over the randomness of  $u$ . It follows that the expected cost of (any)  $\mathcal{D}$  with respect to the chosen distribution over utilities is at least  $1 - 2\exp(-m/100) - \exp(-m/200)$ .  $\square$

## C Appendix for Section 4

This section is devoted to proving our main result:

**Theorem 3.** *Suppose  $\mathcal{G}$  is a family of deterministic classifiers of Natarajan dimension  $d$ , and let  $\mathcal{H} = \mathcal{H}(\mathcal{G}, m)$  for  $m \in \mathbb{N}$ . For any distribution  $P$  over  $\mathcal{X}$ ,  $\gamma > 0$ , and  $\delta > 0$ , if  $S = \{(x_i, x'_i)\}_{i=1}^n$  is an i.i.d. sample of pairs drawn from  $P$  of size*

$$n \geq O\left(\frac{1}{\gamma^2} \left(dm^2 \log \frac{dm|\mathcal{Y}| \log(m|\mathcal{Y}|/\gamma)}{\gamma} + \log \frac{1}{\gamma}\right)\right),$$

*then with probability at least  $1 - \delta$ , every classifier  $h \in \mathcal{H}$  that is  $(\alpha, \beta)$ -pairwise-EF on  $S$  is also  $(\alpha + 7\gamma, \beta + 4\gamma)$ -EF on  $P$ .*

We start with an observation that will be required later.

**Lemma 4.** *Let  $\mathcal{G} = \{g : \mathcal{X} \rightarrow \mathcal{Y}\}$  have Natarajan dimension  $d$ . For  $g_1, g_2 \in \mathcal{G}$ , let  $(g_1, g_2) : \mathcal{X} \rightarrow \mathcal{Y}^2$  denote the function given by  $(g_1, g_2)(x) = (g_1(x), g_2(x))$  and let  $\mathcal{G}^2 = \{(g_1, g_2) : g_1, g_2 \in \mathcal{G}\}$ . Then the Natarajan dimension of  $\mathcal{G}^2$  is at most  $2d$ .*

*Proof.* Let  $D$  be the Natarajan dimension of  $\mathcal{G}^2$ . Then we know that there exists a collection of points  $x_1, \dots, x_D \in \mathcal{X}$  that is shattered by  $\mathcal{G}^2$ , which means there are two sequences  $q_1, \dots, q_n \in \mathcal{Y}^2$  and  $q'_1, \dots, q'_n \in \mathcal{Y}^2$  such that for all  $i$  we have  $q_i \neq q'_i$  and for any subset  $C \subset [D]$  of indices, there exists  $(g_1, g_2) \in \mathcal{G}^2$  such that  $(g_1, g_2)(x_i) = q_i$  if  $i \in C$  and  $(g_1, g_2)(x_i) = q'_i$  otherwise.

Let  $n_1 = \sum_{i=1}^D \mathbb{I}\{q_{i1} \neq q'_{i1}\}$  and  $n_2 = \sum_{i=1}^D \mathbb{I}\{q_{i2} \neq q'_{i2}\}$  be the number of pairs on which the first and second labels of  $q_i$  and  $q'_i$  disagree, respectively. Since none of the  $n$  pairs are equal, we know that  $n_1 + n_2 \geq D$ , which implies that at least one of  $n_1$  or  $n_2$  must be  $\geq D/2$ . Assume without loss of generality that  $n_1 \geq D/2$  and that  $q_{i1} \neq q'_{i1}$  for  $i = 1, \dots, n_1$ . Now consider any subset of indices  $C \subset [n_1]$ . We know there exists a pair of functions  $(g_1, g_2) \in \mathcal{G}^2$  with  $(g_1, g_2)(x_i)$  evaluating to  $q_i$  if  $i \in C$  and  $q'_i$  if  $i \notin C$ . But then we have  $g_1(x_i) = q_{i1}$  if  $i \in C$  and  $g_1(x_i) = q'_{i1}$  if  $i \notin C$ , and  $q_{i1} \neq q'_{i1}$  for all  $i \in [n_1]$ . It follows that  $\mathcal{G}$  shatters  $x_1, \dots, x_{n_1}$ , which consists of at least  $D/2$  points. Therefore, the Natarajan dimension of  $\mathcal{G}^2$  is at most  $2d$ , as required.  $\square$

We now turn to the theorem's two main steps, presented in the following two lemmas.

**Lemma 5.** Let  $\mathcal{H} \subset \{h : \mathcal{X} \rightarrow \Delta(\mathcal{Y})\}$  be a finite family of classifiers. For any  $\gamma > 0$ ,  $\delta > 0$ , and  $\beta \geq 0$  if  $S = \{(x_i, x'_i)\}_{i=1}^n$  is an i.i.d. sample of pairs from  $P$  of size  $n \geq \frac{1}{2\gamma^2} \ln \frac{|\mathcal{H}|}{\delta}$ , then with probability at least  $1 - \delta$ , every  $h \in \mathcal{H}$  that is  $(\alpha, \beta)$ -pairwise-EF on  $S$  (for any  $\alpha$ ) is also  $(\alpha + \gamma, \beta)$ -EF on  $P$ .

*Proof.* Let  $f(x, x', h) = \mathbb{I}\{u(x, h(x)) < u(x, h(x')) - \beta\}$  be the indicator that  $x$  is envious of  $x'$  by at least  $\beta$  under classifier  $h$ . Then  $f(x_i, x'_i, h)$  is a Bernoulli random variable with success probability  $\mathbb{E}_{x, x' \sim P}[f(x, x', h)]$ . Applying Hoeffding's inequality to any fixed hypothesis  $h \in \mathcal{H}$  guarantees that  $\Pr_S(\mathbb{E}_{x, x' \sim P}[f(x, x', h)] \geq \frac{1}{n} \sum_{i=1}^n f(x_i, x'_i, h) + \gamma) \leq \exp(-2n\gamma^2)$ . Therefore, if  $h$  is  $(\alpha, \beta)$ -EF on  $S$ , then it is also  $(\alpha + \gamma, \beta)$ -EF on  $P$  with probability at least  $1 - \exp(-2n\gamma^2)$ . Applying the union bound over all  $h \in \mathcal{H}$  and using the lower bound on  $n$  completes the proof.  $\square$

Next, we show that  $\mathcal{H}(\mathcal{G}, m)$  can be covered by a finite subset. Since each classifier in  $\mathcal{H}$  is determined by the choice of  $m$  functions from  $\mathcal{G}$  and mixing weights  $\eta \in \Delta_m$ , we will construct finite covers of  $\mathcal{G}$  and  $\Delta_m$ . Our covers  $\hat{\mathcal{G}}$  and  $\hat{\Delta}_m$  will guarantee that for every  $g \in \mathcal{G}$ , there exists  $\hat{g} \in \hat{\mathcal{G}}$  such that  $\Pr_{x \sim P}(g(x) \neq \hat{g}(x)) \leq \gamma/m$ . Similarly, for any mixing weights  $\eta \in \Delta_m$ , there exists  $\hat{\eta} \in \hat{\Delta}_m$  such that  $\|\eta - \hat{\eta}\|_1 \leq \gamma$ . If  $h \in \mathcal{H}(\mathcal{G}, m)$  is the mixture of  $g_1, \dots, g_m$  with weights  $\eta$ , we let  $\hat{h}$  be the mixture of  $\hat{g}_1, \dots, \hat{g}_m$  with weights  $\hat{\eta}$ . This approximation has two sources of error: first, for a random individual  $x \sim P$ , there is probability up to  $\gamma$  that at least one  $g_i(x)$  will disagree with  $\hat{g}_i(x)$ , in which case  $h$  and  $\hat{h}$  may assign completely different outcome distributions. Second, even in the high-probability event that  $g_i(x) = \hat{g}_i(x)$  for all  $i \in [m]$ , the mixing weights are not identical, resulting in a small perturbation of the outcome distribution assigned to  $x$ .

**Lemma 6.** Let  $\mathcal{G}$  be a family of deterministic classifiers with Natarajan dimension  $d$ , and let  $\mathcal{H} = \mathcal{H}(\mathcal{G}, m)$  for some  $m \in \mathbb{N}$ . For any  $\gamma > 0$ , there exists a subset  $\hat{\mathcal{H}} \subset \mathcal{H}$  of size  $O\left(\frac{(dm|\mathcal{Y}|^2 \log(m|\mathcal{Y}|/\gamma))^{dm}}{\gamma^{(d+1)m}}\right)$  such that for every  $h \in \mathcal{H}$  there exists  $\hat{h} \in \hat{\mathcal{H}}$  satisfying:

1.  $\Pr_{x \sim P}(\|h(x) - \hat{h}(x)\|_1 > \gamma) \leq \gamma$ .
2. If  $S$  is an i.i.d. sample of individuals of size  $O(\frac{m^2}{\gamma^2}(d \log |\mathcal{Y}| + \log \frac{1}{\delta}))$  then w.p.  $\geq 1 - \delta$ , we have  $\|h(x) - \hat{h}(x)\|_1 \leq \gamma$  for all but a  $2\gamma$ -fraction of  $x \in S$ .

*Proof.* As described above, we begin by constructing finite covers of  $\Delta_m$  and  $\mathcal{G}$ . First, let  $\hat{\Delta}_m \subset \Delta_m$  be the set of distributions over  $[m]$  where each coordinate is a multiple of  $\gamma/m$ . Then we have  $|\hat{\Delta}_m| = O((\frac{m}{\gamma})^m)$  and for every  $p \in \Delta_m$ , there exists  $q \in \hat{\Delta}_m$  such that  $\|p - q\|_1 \leq \gamma$ .

In order to find a small cover of  $\mathcal{G}$ , we use the fact that it has low Natarajan dimension. This implies that the number of effective functions in  $\mathcal{G}$  when restricted to a sample  $S'$  grows only polynomially in the size of  $S'$ . At the same time, if two functions in  $\mathcal{G}$  agree on a large sample, they will also agree with high probability on the distribution.

Formally, let  $S'$  be an i.i.d. sample drawn from  $P$  of size  $O(\frac{m^2}{\gamma^2} d \log |\mathcal{Y}|)$ , and let  $\hat{\mathcal{G}} = \mathcal{G}|_{S'}$  be any minimal subset of  $\mathcal{G}$  that realizes all possible labelings of  $S'$  by functions in  $\mathcal{G}$ . We now argue that with probability 0.99, for every  $g \in \mathcal{G}$  there exists  $\hat{g} \in \hat{\mathcal{G}}$  such that  $\Pr_{x \sim P}(g(x) \neq \hat{g}(x)) \leq \gamma/m$ . For any pair of functions  $g, g' \in \mathcal{G}$ , let  $(g, g') : \mathcal{X} \rightarrow \mathcal{Y}^2$  be the function given by  $(g, g')(x) = (g(x), g'(x))$ , and let  $\mathcal{G}^2 = \{(g, g') : g, g' \in \mathcal{G}\}$ . The Natarajan dimension of  $\mathcal{G}^2$  is at most  $2d$  by Lemma 4. Moreover, consider the loss  $c : \mathcal{G}^2 \times \mathcal{X} \rightarrow \{0, 1\}$  given by  $c(g, g', x) = \mathbb{I}\{g(x) \neq g'(x)\}$ . Applying Lemma 2 with the chosen size of  $|S'|$  ensures that with probability at least 0.99 every pair  $(g, g') \in \mathcal{G}^2$  satisfies

$$\left| \mathbb{E}_{x \sim P}[c(g, g', x)] - \frac{1}{|S'|} \sum_{x \in S'} c(g, g', x) \right| \leq \frac{\gamma}{m}.$$

By the definition of  $\hat{\mathcal{G}}$ , for every  $g \in \mathcal{G}$ , there exists  $\hat{g} \in \hat{\mathcal{G}}$  for which  $c(g, \hat{g}, x) = 0$  for all  $x \in S'$ , which implies that  $\Pr_{x \sim P}(g(x) \neq \hat{g}(x)) \leq \gamma/m$ .

Using Lemma 1 to bound the size of  $\hat{\mathcal{G}}$ , we have that

$$|\hat{\mathcal{G}}| \leq |S'|^d |\mathcal{Y}|^{2d} = O\left(\left(\frac{m^2}{\gamma^2} d |\mathcal{Y}|^2 \log |\mathcal{Y}|\right)^d\right).$$

Since this construction succeeds with non-zero probability, we are guaranteed that such a set  $\hat{\mathcal{G}}$  exists. Finally, by an identical uniform convergence argument, it follows that if  $S$  is a fresh i.i.d. sample of the size given in Item 2 of the lemma's statement, then, with probability at least  $1 - \delta$ , every  $g$  and  $\hat{g}$  will disagree on at most a  $2\gamma/m$ -fraction of  $S$ , since they disagree with probability at most  $\gamma/m$  on  $P$ .

Next, let  $\hat{\mathcal{H}} = \{h_{\vec{g}, \eta} : \vec{g} \in \hat{\mathcal{G}}^m, \eta \in \hat{\Delta}_m\}$  be the same family as  $\mathcal{H}$ , except restricted to choosing functions from  $\hat{\mathcal{G}}$  and mixing weights from  $\hat{\Delta}_m$ . Using the size bounds above and the fact that  $\binom{N}{m} = O((\frac{N}{m})^m)$ , we have that

$$|\hat{\mathcal{H}}| = \binom{|\hat{\mathcal{G}}|}{m} \cdot |\hat{\Delta}_m| = O\left(\frac{(dm^2 |\mathcal{Y}|^2 \log(m|\mathcal{Y}|/\gamma))^{dm}}{\gamma^{(2d+1)m}}\right).$$

Suppose that  $h$  is the mixture of  $g_1, \dots, g_m \in \mathcal{G}$  with weights  $\eta \in \Delta_m$ . Let  $\hat{g}_i$  be the approximation to  $g_i$  for each  $i$ , let  $\hat{\eta} \in \hat{\Delta}_m$  be such that  $\|\eta - \hat{\eta}\|_1 \leq \gamma$ , and let  $\hat{h}$  be the random mixture of  $\hat{g}_1, \dots, \hat{g}_m$  with weights  $\hat{\eta}$ . For an individual  $x$  drawn from  $P$ , we have  $g_i(x) \neq \hat{g}_i(x)$  with probability at most  $\gamma/m$ , and therefore they all agree with probability at least  $1 - \gamma$ . When this event occurs, we have  $\|h(x) - \hat{h}(x)\|_1 \leq \|\eta - \hat{\eta}\|_1 \leq \gamma$ .

The second part of the claim follows by similar reasoning, using the fact that for the given sample size  $|S|$ , with probability at least  $1 - \delta$ , every  $g \in \mathcal{G}$  disagrees with its approximation  $\hat{g} \in \hat{\mathcal{G}}$  on at most a  $2\gamma/m$ -fraction of  $S$ . This means that  $\hat{g}_i(x) = g_i(x)$  for all  $i \in [m]$  on at least a  $(1 - 2\gamma)$ -fraction of the individuals  $x$  in  $S$ . For these individuals,  $\|h(x) - \hat{h}(x)\|_1 \leq \|\eta - \hat{\eta}\|_1 \leq \gamma$ .  $\square$

Combining the generalization guarantee for finite families given in Lemma 5 with the finite approximation given in Lemma 6, we are able to show that envy-freeness also generalizes for  $\mathcal{H}(\mathcal{G}, m)$ .

*Proof of Theorem 3.* Let  $\hat{\mathcal{H}}$  be the finite approximation to  $\mathcal{H}$  constructed in Lemma 6. If the sample is of size  $|S| = O(\frac{1}{\gamma^2} (dm \log(dm|\mathcal{Y}| \log |\mathcal{Y}|/\gamma) + \log \frac{1}{\delta}))$ , we can apply Lemma 5 to this finite family, which implies that for any  $\beta' \geq 0$ , with probability at least  $1 - \delta/2$  every  $\hat{h} \in \hat{\mathcal{H}}$  that is  $(\alpha', \beta')$ -pairwise-EF on  $S$  (for any  $\alpha'$ ) is also  $(\alpha' + \gamma, \beta')$ -EF on  $P$ . We apply this lemma with  $\beta' = \beta + 2\gamma$ . Moreover, from Lemma 6, we know that if  $|S| = O(\frac{m^2}{\gamma^2} (d \log |\mathcal{Y}| + \log \frac{1}{\delta}))$ , then with probability at least  $1 - \delta/2$ , for every  $h \in \mathcal{H}$ , there exists  $\hat{h} \in \hat{\mathcal{H}}$  satisfying  $\|h(x) - \hat{h}(x)\|_1 \leq \gamma$  for all but a  $2\gamma$ -fraction of the individuals in  $S$ . This implies that on all but at most a  $4\gamma$ -fraction of the pairs in  $S$ ,  $h$  and  $\hat{h}$  satisfy this inequality for both individuals in the pair. Assume these high probability events occur. Finally, from Item 1 of the lemma we have that  $\Pr_{x_1, x_2 \sim P}(\max_{i=1,2} \|h(x_i) - \hat{h}(x_i)\|_1 > \gamma) \leq 2\gamma$ .

Now let  $h \in \mathcal{H}$  be any classifier that is  $(\alpha, \beta)$ -pairwise-EF on  $S$ . Since the utilities are in  $[0, 1]$  and  $\max_{x=x_i, x'_i} \|h(x) - \hat{h}(x)\|_1 \leq \gamma$  for all but a  $4\gamma$ -fraction of the pairs in  $S$ , we know that  $\hat{h}$  is  $(\alpha + 4\gamma, \beta + 2\gamma)$ -pairwise-EF on  $S$ . Applying the envy-freeness generalization guarantee (Lemma 5) for  $\hat{\mathcal{H}}$ , it follows that  $\hat{h}$  is also  $(\alpha + 5\gamma, \beta + 2\gamma)$ -EF on  $P$ . Finally, using the fact that

$$\Pr_{x_1, x_2 \sim P} \left( \max_{i=1,2} \|h(x_i) - \hat{h}(x_i)\|_1 > \gamma \right) \leq 2\gamma,$$

it follows that  $h$  is  $(\alpha + 7\gamma, \beta + 4\gamma)$ -EF on  $P$ .  $\square$

It is worth noting that the (exponentially large) approximation  $\hat{\mathcal{H}}$  is only used in the generalization analysis; importantly, an ERM algorithm need not construct it.



## D Appendix for Section 5

Here we describe details of the transformation of the optimization problem from (2) to (4). Firstly, softening constraints of (2) with slack variables, we obtain

$$\begin{aligned} \min_{g_k \in \mathcal{G}, \xi \in \mathbb{R}_{\geq 0}^{n \times n}} \quad & \sum_{i=1}^n L(x_i, g_k(x_i)) + \lambda \sum_{i \neq j} \xi_{ij} \\ \text{s.t.} \quad & USF_{ii}^{(k-1)} + \tilde{\eta}_k u(x_i, g_k(x_i)) \geq USF_{ij}^{(k-1)} + \tilde{\eta}_k u(x_i, g_k(x_j)) - \xi_{ij} \quad \forall (i, j). \end{aligned}$$

Here,  $\xi_{ij}$  basically captures how much  $i$  envies  $j$  under the selected assignments (note that,  $\xi_{ij}$  is 0 if the pair is non-envious, so that the algorithm does not go increasing negative envy at the cost of positive envy for someone else). Plugging in optimal values of the slack variables, we obtain

$$\begin{aligned} \min_{g_k \in \mathcal{G}} \quad & \sum_{i=1}^n L(x_i, g_k(x_i)) \\ & + \lambda \sum_{i \neq j} \max \left( USF_{ij}^{(k-1)} + \tilde{\eta}_k u(x_i, g_k(x_j)) - USF_{ii}^{(k-1)} - \tilde{\eta}_k u(x_i, g_k(x_i)), 0 \right). \quad (8) \end{aligned}$$

Next, we perform convex relaxation of different components of this objective function. For this, let's observe the term  $L(x_i, g_k(x_i))$ . And, let  $\vec{w}$  denote the parameters of  $g_k$ . By definition, we have

$$w_{g_k(x_i)}^\top x_i \geq w_{y'}^\top x_i$$

for any  $y' \in \mathcal{Y}$ . This implies that

$$\begin{aligned} L(x_i, g_k(x_i)) & \leq L(x_i, g_k(x_i)) + w_{g_k(x_i)}^\top x_i - w_{y'}^\top x_i \\ & \leq \max_{y \in \mathcal{Y}} \{ L(x_i, y) + w_y^\top x_i - w_{y_i}^\top x_i \}, \end{aligned}$$

giving us a convex upper bound on the loss  $L(x_i, g_k(x_i))$ . As this holds for any  $y' \in \mathcal{Y}$ , we choose  $y' = y_i$  as defined in the main body, since it leads to the lowest achievable loss value. Therefore, we have

$$L(x_i, g_k(x_i)) \leq \max_{y \in \mathcal{Y}} \{ L(x_i, y) + w_y^\top x_i - w_{y_i}^\top x_i \}.$$

This right hand side is basically an upper bound which apart from encouraging  $\vec{w}$  to have the highest dot product with  $x_i$  at  $y_i$ , also penalizes if the margin by which this is higher is not enough (where the margin depends on other losses  $L(x_i, y)$ ). This surrogate loss is very similar to multi-class support vector machines. We perform similar relaxations for the other two components of the objective function. In particular, for the  $u(x_i, g_k(x_i))$  term, we have

$$-u(x_i, g_k(x_i)) \leq \max_{y \in \mathcal{Y}} \{ -u(x_i, y) + w_y^\top x_i - w_{b_i}^\top x_i \},$$

where  $b_i$  is as defined in the main body. Finally, for the remaining term, we have

$$u(x_i, g_k(x_j)) \leq \max_{y \in \mathcal{Y}} \{ u(x_i, y) + w_y^\top x_j - w_{s_i}^\top x_j \},$$

where  $s_i$  is as defined in the main body<sup>5</sup>. On plugging in the convex surrogates of all three terms in Equation (8), we obtain the optimization problem (4).

<sup>5</sup>Note that, instead of using  $s_i$ , an alternative to use in this equation is  $b_j$ . In particular, for a pair  $(i, j)$ , using  $s_i$  encourages the assignment to give  $i$  their favorite outcome while  $j$  the outcome that  $i$  likes the least (and hence causing  $i$  to envy  $j$  as less as possible), while using  $b_j$  encourages the assignment to give both  $i$  and  $j$  their favorite outcomes (pushing the assignment to just give everyone their favorite outcomes).
